# Supplementary material
Source: publisher figshare collection journal article supplement (https://future-science-group.figshare.com/ndownloader/files/31796282)
Supplement: Supplementary file 1 [file 31796282]

**Supplementary Table 3.** Call rate for genotyped single nucleotide polymorphisms, included into genetic association analysis of coronary artery disease susceptibility.

| Gene, SNP | Number of genotyped individuals | Call rate, % |
| --- | --- | --- |
| *LPA* rs10455872 | 1697 | 100 |
| *LDLR* rs11672123 | 1696 | 99.9 |
| *LDLR* rs6511720 | 1693 | 99.8 |
| *APOC1* rs445925 | 1275 | 75.1 |
| *APOE* rs7412 | 669 | 39.4 |
| *MYLIP* rs6924995 | 1694 | 99.8 |
| *MYLIP* rs3757354 | 1696 | 99.9 |
| *ABCG2* rs2199936 | 1682 | 99.1 |
| *ABCG2* rs1481012 | 1694 | 99.8 |
